# Supplementary material
Source: ML conference proceedings conference paper supplement (https://openaccess.thecvf.com/content/ICCV2025/html/Goyal_GEOPARD_Geometric_Pretraining_ICCV_2025_paper.html)
Supplement: Supplementary file 1 [file Goyal_GEOPARD_Geometric_Pretraining_ICCV_2025_supplemental.pdf]

# GEOPARD: Geometric Pretraining for Articulation Prediction in 3D Shapes

## Supplementary Material

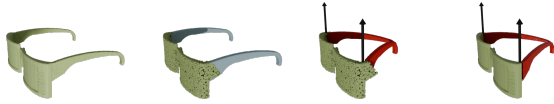

Figure 1. Results using PartSTAD, an off-the-shelf segmentation method. (1) input shape, (2) PartSTAD segmentation, (3) sampled articulated state from predicted parameters. (4) same articulation state from GT segmentation and GT parameters.

| Model              | AE ↓ | PE ↓ | R-ACC ↑ | P-ACC ↑ |
|--------------------|------|------|---------|---------|
| GEOPARD-u-GT       | 7.24 | 0.07 | 0.96    | 0.98    |
| GEOPARD-u-PartSTAD | 9.34 | 0.08 | 0.95    | 0.93    |

Table 1. Using off-the-shelf vs ground-truth segmentation.

### 1. Off-the-shelf segmentation

We evaluated the robustness of our approach using part segmentations produced by PartSTAD [?], a few-shot, VLM-based point cloud model. Since VLMs perform surface segmentation, we filter out object classes with interior structures and test on the following classes: *box*, *dishwasher*, *door*, *eyeglasses*, *refrigerator*, and *trash can*.

Table 1 shows the average quantitative results across these classes in the unlabeled setting. Although there is a slight degradation in metrics compared to ground-truth (“GT”) segmentation, overall performance remains competitive, indicating that our method can maintain reliable articulation predictions under imperfect segmentation. We illustrate this qualitatively in Figure 1 – our method predicts the correct rotation for test shape even with segmentation noise.

We note that shape segmentation is orthogonal to our contributions; our method may benefit further from advances in this space.

### 2. Implementation details

Our network stacks 6 layers of cross-attention and 12 layers of self-attention, each with 8 heads. The decoder consists of lightweight 2-layer MLP blocks whose output dimensionality adapts to the target parameter set (pretraining vs. fine-tuning). We use a batch size of 60 and train on 2 NVIDIA A40 GPUs.
